# Supplementary material for: Chitosan/Gelatin/Silver Nanoparticles Composites Films for Biodegradable Food Packaging Applications
Source: MDPI journal article supplement (doi:10.3390/polym13111680), 2021-05-21
Supplement: s1 [file s1]

## Supplementary Materials

# Chitosan/Gelatin/Silver Nanoparticles Composites Films for Biodegradable Food Packaging Applications

Sreelekha Ediyilyam <sup>1</sup>, Bini George <sup>1,\*</sup>, Sarojini Sharath Shankar <sup>2,5,\*</sup>, Dennis Thomas T <sup>3</sup>, Stanisław Wacławek <sup>4</sup>, Miroslav Černík <sup>4,\*</sup> and Vinod V.T. Padil <sup>4,\*</sup>

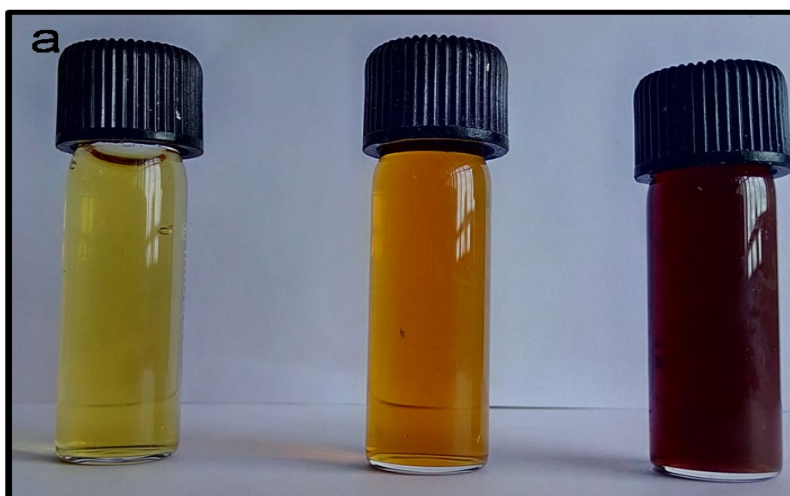

**Figure S1.** Green synthesized nanoparticles colour change observed from pale yellow to dark yellow then finally to red-dish brown.

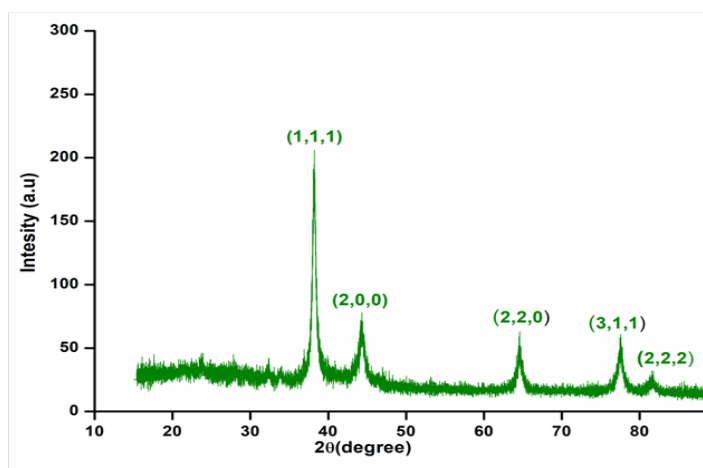

**Figure S2.** X-ray diffraction patterns of AgNPs synthesized using *M. frondosa* leaf extract. The diffraction data acquired were in agreement with the literature reports of FCC structure of silver (JCPDS file no. 04-0783).

**Table S1.** Antibacterial activity of AgNPs.

| Sample concentration<br>(µg/ml) | Zone of inhibition (mm) |    |                  |    |
|---------------------------------|-------------------------|----|------------------|----|
|                                 | <i>S. Aureus</i>        |    | <i>S. Mutans</i> |    |
| Streptomycin<br>(100 µg)        | 26                      | 28 | 27               | 28 |
| 250                             | 12                      | 14 | 15               | 14 |
| 500                             | 15                      | 17 | 17               | 17 |
| 1000                            | 19                      | 20 | 19               | 20 |

**Table S2.** Antifungal activity of AgNPs (*Candida albicans*).

| Sample concentration<br>(µg/ml) | Zone of inhibition (mm) |
|---------------------------------|-------------------------|
| Clotrimazole<br>(100 µg)        | 26                      |
| 250                             | 11                      |
| 500                             | 13                      |
| 1000                            | 16                      |

**Table S3.** Colony forming units of bacterial suspension from carrots stored in different films.

| Carrot study in different films | Colony forming units (CFU/mL) |
|---------------------------------|-------------------------------|
| Plastic films                   | 80x10 <sup>10</sup>           |
| CG                              | 14x10 <sup>10</sup>           |
| CG4                             | 10x10 <sup>10</sup>           |

**Equation S1:** Opacity of the films is calculated by taking the absorbance at 600nm using UV-Visible spectroscopy. Then, the opacity was calculated using the following equation:

$$O = \frac{\text{Abs600}}{L}$$

Where, O is the opacity, Abs600 is the absorbance value at 600 nm and L is the film thickness (mm).

**Equation S2** colony-forming unit (CFU or cfu) is a measure of viable bacterial or fungal cells CFU/ml can be calculated using the formula:

$$\text{cfu/ml} = (\text{No. of colonies} \times \text{dilution factor}) / \text{volume of culture plate}$$

**Table S4.** Thickness of the films.

| Films | Thickness of the films |      |      |         |       |       |
|-------|------------------------|------|------|---------|-------|-------|
|       | x                      | y    | z    | Average | SD    | SE    |
| CG    | 0.03                   | 0.03 | 0.04 | 0.033   | 0.005 | 0.002 |
| CG1   | 0.05                   | 0.05 | 0.04 | 0.046   | 0.005 | 0.002 |
| CG2   | 0.05                   | 0.05 | 0.05 | 0.05    | 0.00  | 0.00  |
| CG3   | 0.08                   | 0.06 | 0.08 | 0.073   | 0.011 | 0.005 |
| CG4   | 0.09                   | 0.09 | 0.09 | 0.09    | 0.00  | 0.0   |

SD- standard deviation, SE- Standard error

**Table S5.** Apparent density of the films.

| Films | Apparent density of the films |      |      |         |        |       |
|-------|-------------------------------|------|------|---------|--------|-------|
|       | x                             | y    | z    | Average | SD     | SE    |
| CG    | 0.11                          | 0.13 | 0.1  | 0.1133  | 0.015  | 0.008 |
| CG1   | 0.17                          | 0.15 | 0.18 | 0.1666  | 0.015  | 0.008 |
| CG2   | 0.16                          | 0.16 | 0.16 | 0.16    | 0      | 0     |
| CG3   | 0.16                          | 0.15 | 0.16 | 0.156   | 0.0057 | 0.003 |
| CG4   | 0.25                          | 0.23 | 0.27 | 0.25    | 0.02   | 0.011 |

**Table S6.** Opacity of the films.

| Films | Opacity of the films |      |      |         |       |       |
|-------|----------------------|------|------|---------|-------|-------|
|       | x                    | y    | z    | Average | SD    | SE    |
| CG    | 1.47                 | 1.4  | 1.5  | 1.456   | 0.051 | 0.029 |
| CG1   | 1.6                  | 1.51 | 1.68 | 1.596   | 0.085 | 0.049 |
| CG2   | 2.25                 | 2.4  | 2.32 | 2.323   | 0.075 | 0.043 |
| CG3   | 3.49                 | 3.56 | 3.41 | 3.486   | 0.075 | 0.043 |
| CG4   | 4.94                 | 4.88 | 4.99 | 4.936   | 0.055 | 0.031 |

**Table S6.** Tensile strength of the films.

| Films | Tensile strength of the films |      |      |         |       |      |
|-------|-------------------------------|------|------|---------|-------|------|
|       | x                             | y    | z    | Average | SD    | SE   |
| CG    | 24.4                          | 24.4 | 24.5 | 24.4    | 0.066 | 0.03 |
| CG1   | 25.8                          | 25.9 | 25.7 | 25.8    | 0.1   | 0.05 |
| CG2   | 26.3                          | 26.6 | 26.1 | 26.3    | 0.25  | 0.14 |
| CG3   | 26.4                          | 26.4 | 26.5 | 26.4    | 0.05  | 0.03 |
| CG4   | 24.4                          | 24.4 | 24.5 | 24.4    | 0.06  | 0.03 |

**Table S7.** Elongation at break.

| Films | EAB (%) of the films |     |     |         |      |      |
|-------|----------------------|-----|-----|---------|------|------|
|       | x                    | y   | z   | Average | SD   | SE   |
| CG    | 4.4                  | 4.5 | 4.4 | 4.4     | 0.05 | 0.02 |
| CG1   | 4.3                  | 4.2 | 4.3 | 4.3     | 0.05 | 0.02 |
| CG2   | 4.2                  | 4.2 | 4.3 | 4.2     | 0.04 | 0.02 |
| CG3   | 4.1                  | 4.0 | 4.1 | 4.1     | 0.05 | 0.02 |
| CG4   | 4.5                  | 4.4 | 4.5 | 4.5     | 0.06 | 0.03 |

**Table S8.** Swelling degree of films.

| Films | Swelling degree of the films |     |       |         |      |      |
|-------|------------------------------|-----|-------|---------|------|------|
|       | x                            | y   | z     | Average | SD   | SE   |
| CG    | 119                          | 119 | 120   | 119.3   | 0.57 | 0.33 |
| CG1   | 109                          | 108 | 109.9 | 108.9   | 0.95 | 0.54 |
| CG2   | 102                          | 102 | 101   | 101.6   | 0.57 | 0.33 |
| CG3   | 99                           | 99  | 98    | 98.6    | 0.57 | 0.33 |
| CG4   | 110                          | 109 | 110   | 109.6   | 0.57 | 0.33 |

**Table S8.** WVTR of films.

| Films | WVTR of the films |      |      |         |       |       |
|-------|-------------------|------|------|---------|-------|-------|
|       | x                 | y    | z    | Average | SD    | SE    |
| CG    | 46.7              | 46.7 | 46.7 | 46.7    | 0.045 | 0.026 |
| CG1   | 44.6              | 44.7 | 44.6 | 44.6    | 0.03  | 0.020 |
| CG2   | 41.9              | 41.9 | 41.8 | 41.8    | 0.015 | 0.008 |
| CG3   | 40.2              | 40.2 | 40.2 | 40.2    | 0.005 | 0.003 |

|     |      |      |      |      |       |       |
|-----|------|------|------|------|-------|-------|
| CG4 | 40.1 | 40.1 | 40.1 | 40.1 | 0.026 | 0.015 |
|-----|------|------|------|------|-------|-------|

**Table S9.** Moisture retention capability of films.

| Films | MRC of the films |      |      |         |       |       |
|-------|------------------|------|------|---------|-------|-------|
|       | x                | y    | z    | Average | SD    | SE    |
| CG    | 91.7             | 91.7 | 91.7 | 91.7    | 0.020 | 0.012 |
| CG1   | 90.5             | 90.5 | 90.6 | 90.56   | 0.04  | 0.023 |
| CG2   | 90.2             | 90.2 | 90.2 | 90.2    | 0.005 | 0.003 |
| CG3   | 89.4             | 89.4 | 89.4 | 89.4    | 0.011 | 0.006 |
| CG4   | 88.5             | 88.5 | 88.5 | 88.5    | 0.015 | 0.008 |

**Table S10.** Solubility of films.

| Films | Solubility of films |      |      |         |      |      |
|-------|---------------------|------|------|---------|------|------|
|       | x                   | y    | z    | Average | SD   | SE   |
| CG    | 42.9                | 43.5 | 42.2 | 42.9    | 0.64 | 0.36 |
| CG1   | 44.9                | 45.1 | 44.7 | 44.9    | 0.19 | 0.11 |
| CG2   | 48.9                | 49.6 | 48.3 | 48.9    | 0.65 | 0.37 |
| CG3   | 51.5                | 52.0 | 51.0 | 51.5    | 0.54 | 0.31 |
| CG4   | 52.6                | 52.8 | 51.9 | 52.4    | 0.50 | 0.28 |
